# Supplementary material for: AF4 uses the SL1 components of RNAP1 machinery to initiate MLL fusion- and AEP-dependent transcription
Source: PubMed Central journal article supplement (PMC4673504; doi:10.1038/ncomms9869), 2015-11-23
Supplement: ncomms9869-s1.pdf [file ncomms9869-s1.pdf]

## Supplementary Figures

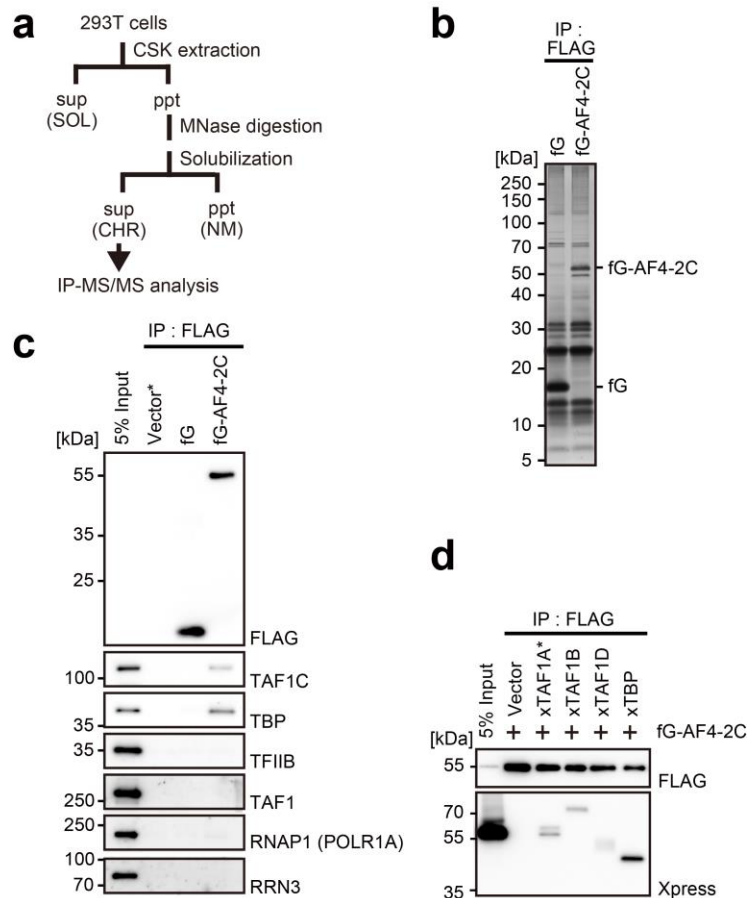

**Supplementary Figure 1** The pSER domain associates specifically with the SL1 complex. (a) Schema of fanChIP analysis. CSK: cytoskeleton buffer; MNase: micrococcal nuclease; sup: supernatant; ppt: pellet; SOL: soluble fraction; CHR: chromatin fraction; NM: nuclear matrix fraction (b) An Oriole-stained image of proteins from 293T cells transiently expressing fG-AF4-2C. Protein was purified using the fanChIP method. (c) The pSER domain specifically associates with endogenous SL1 components. 293T cells were transiently transfected with expression vectors for fG-AF4-2C or fG. FanChIP analysis of the chromatin fraction was performed using an anti-FLAG antibody. FLAG-tagged GAL4 fusion proteins and various endogenous proteins were visualized using the antibodies indicated. The sample shown in the input lane is indicated by an asterisk. (d) Association of SL1 components with the pSER domain. Xpress-tagged SL1 components (xTAF1A, xTAF1B, xTAF1D, and xTBP) were co-expressed with fG-AF4-2C in 293T cells and subjected to fanChIP-WB.

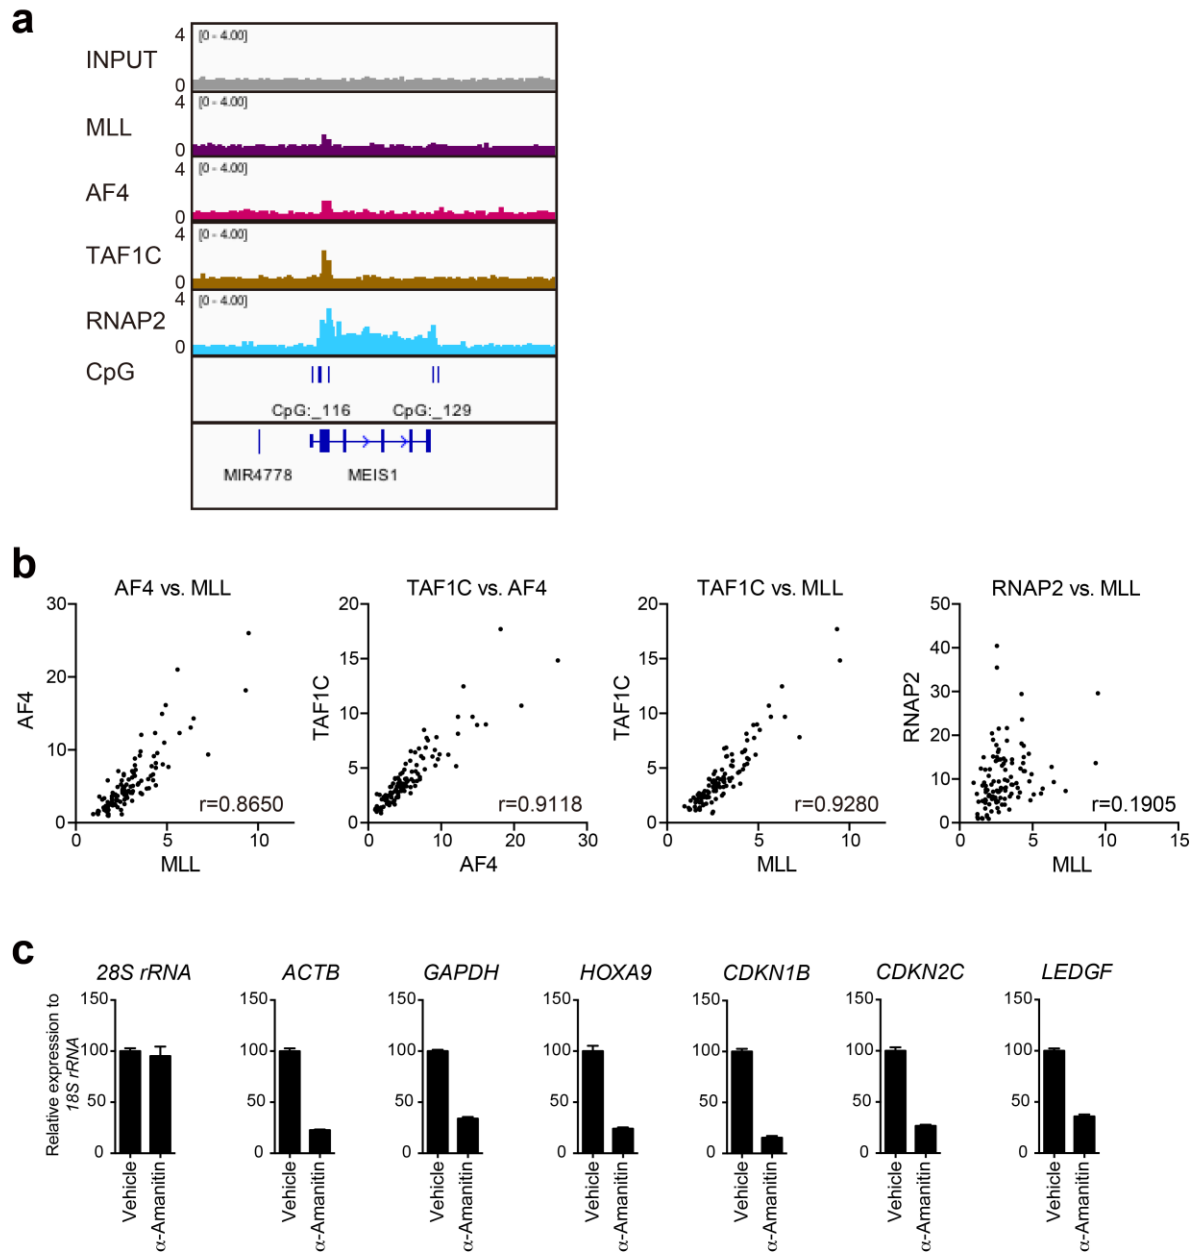

**Supplementary Figure 2** Correlation of ChIP signal intensities at the promoter regions of MLL target genes and effect of  $\alpha$ -amanitin on MLL target gene expression. (a) Localization of MLL-ENL, AF4, TAF1C, and RNAP2 at the MEIS1 locus in HB1119 cells. Chromatin from HB1119 cells was subjected to fanChIP-seq using the indicated antibodies, as described for Figure 3a. (b) Correlation between the ChIP signals of various proteins at the promoter-proximal regions of MLL target genes. FanChIP-seq analyses of HB1119 cells were performed, as described for Figure 3a. ChIP-seq tags were clustered into a 3-kb bin (0 to 3 kb from the TSS). The ChIP signal intensities of the indicated proteins at each MLL target gene were plotted. One data point fell

outside the axis limits in the “MLL vs. RNAP2” plot. The Pearson correlation coefficients are shown in the plots. (c) Effect of  $\alpha$ -amanitin on MLL target gene expression.  $10 \mu\text{g ml}^{-1}$  of alpha-amanitin solubilized in PBS was added to HB1119 cells for 24 h, and the expression of MLL target genes was analyzed with RT-qPCR. The expression level of each gene was normalized to that of 18S rRNA. The expression level is shown relative to the value of the control vector (arbitrarily set at 100%) with error bars (SD of PCR triplicates).

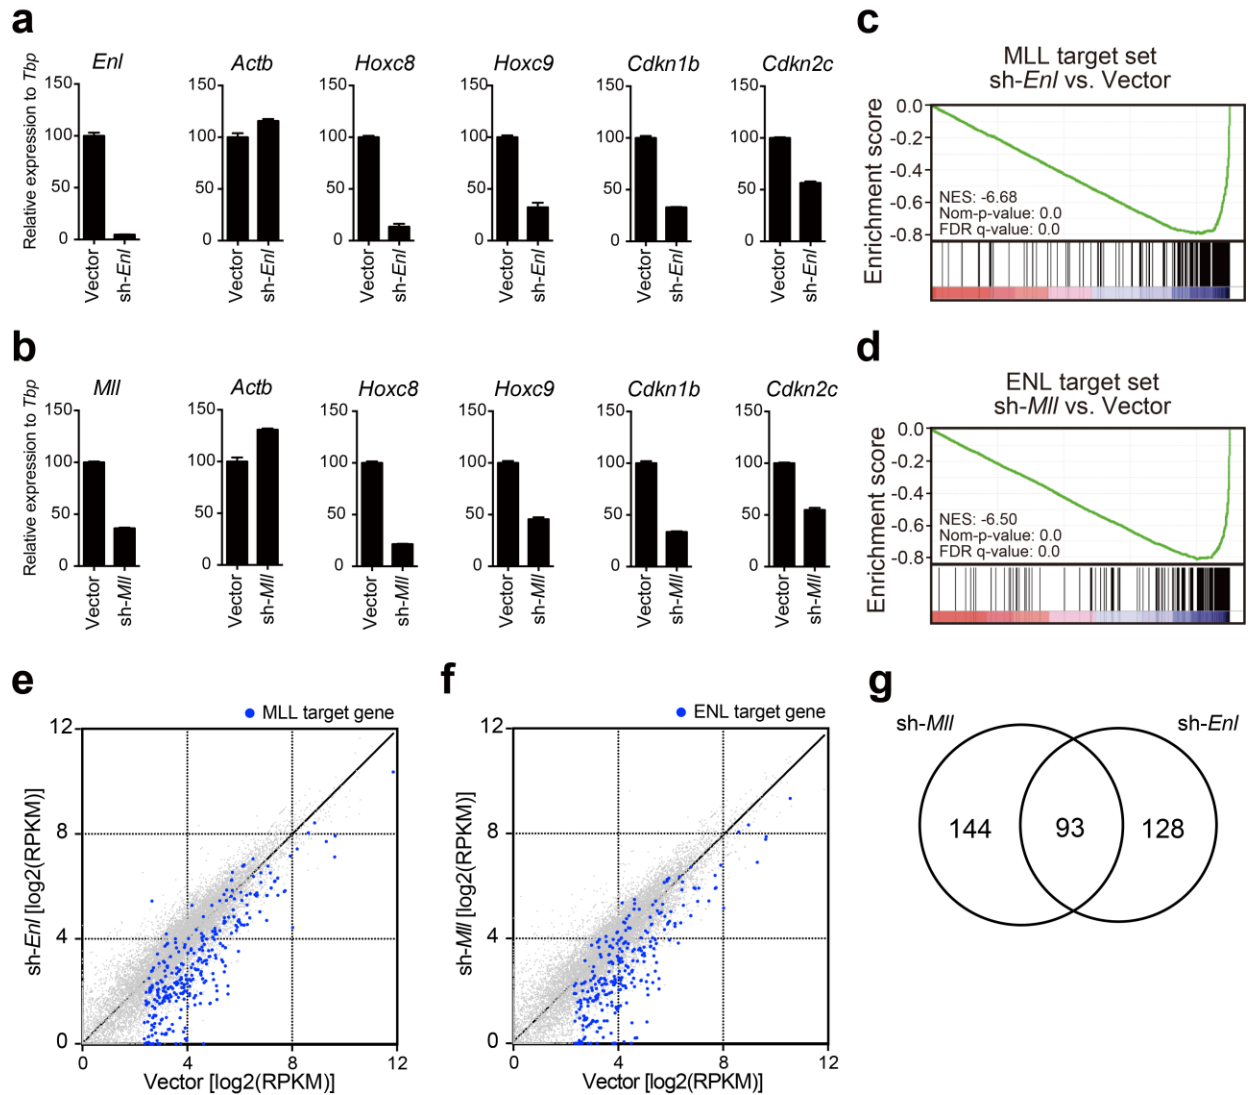

**Supplementary Figure 3** Effect of *Taf1c*, *Enl* and *Mll* knockdown on gene expression. (a) Effect of *Enl* knockdown on AEP-dependent gene activation. *Enl* was knocked down with shRNA in iMEFs, and the expression of AEP target genes was analyzed with RT-qPCR, as described for Figure 4b. The expression of each gene was normalized to that of *Tbp*. The expression level is shown relative to the value of the control vector (arbitrarily set at 100%) with error bars (SD of PCR triplicates). (b) Effect of *Mll* knockdown on AEP-dependent gene activation. *Mll* was knocked down with shRNA in iMEFs, and the expression of AEP target genes was analyzed with RT-qPCR, as in (a). (c) GSEA of the expression profiles of iMEFs, with or without *Enl* knockdown. Genes that exhibited a greater than three-fold decrease upon *Mll* knockdown in RNA-seq analysis were defined as “MLL target genes.” The MLL target gene set was downregulated by *Enl* knockdown. (d) GSEA of the expression profiles of iMEFs, with or

without *Mll* knockdown. Genes that exhibited a greater than three-fold decrease upon *Enl* knockdown in RNA-seq analysis were defined as “ENL target genes.” The ENL target gene set was downregulated by *Mll* knockdown. (e) Scatter plot of gene expression levels with or without *Enl* knockdown. MLL target genes are highlighted in blue. (f) Scatter plot of expression levels with or without *Mll* knockdown. ENL target genes are highlighted in blue. (g) Overlap diagram of the number of down-regulated genes by *Enl* and *Mll* knockdown.

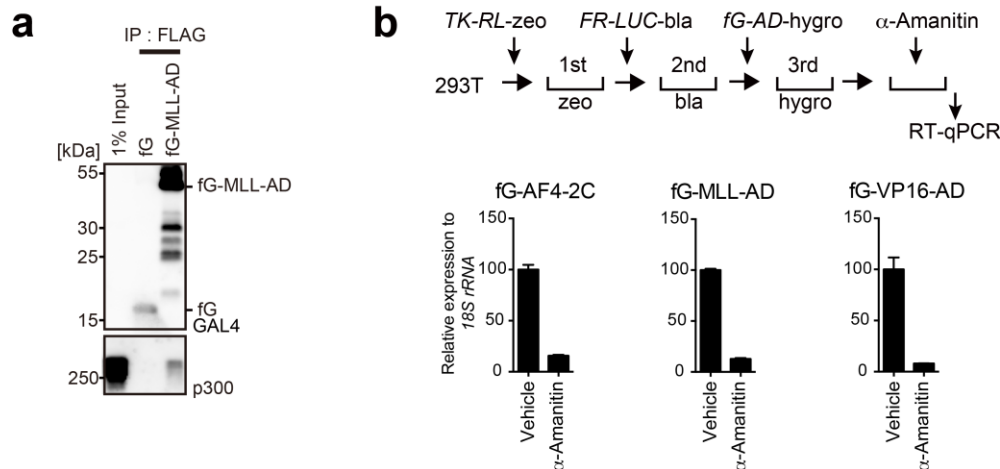

**Supplementary Figure 4** Biological properties of various transactivation domains (a) The activation domain (AD) of MLL associates with p300. 293T cells were transiently transfected with the expression vector for the FLAG-tagged GAL4-MLL-AD protein (fG-MLL-AD). FanChIP-WB analysis was performed using an anti-FLAG antibody. The GAL4 fusion proteins and endogenous p300 proteins were visualized using an anti-GAL4 antibody and an anti-p300 antibody, respectively. (b) Effect of  $\alpha$ -amanitin on transactivation activity of various transactivation domains. 293T-LUC-fG cells were generated by sequential transduction of the pLKO-zeo-TK-RL reporter, pLKO-bla-FR-LUC reporter and the pMSCV-hygro-fGAL4-AD.  $10 \mu\text{g ml}^{-1}$  of  $\alpha$ -amanitin solubilized in PBS was treated for 24 h and the expression of MLL target genes was analyzed with RT-qPCR. The expression of firefly luciferase was normalized to that of 18S rRNA. The expression level is shown relative to the value of the PBS treatment (arbitrarily set at 100%) with error bars (SD of PCR triplicates). Bla: blasticidin; zeo: zeocin; hygro: hygromycin

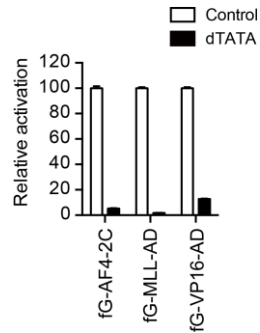

**Supplementary Figure 5** Transactivation activities of various transactivation domains (ADs) on naked reporter plasmids with or without the TATA element. Transcription activation activity of various GAL4-AD fusion proteins on the naked reporter plasmid. 293T cells were transiently transfected with expression vectors for various FLAG-tagged GAL4 fusion proteins, the pRL-TK reporter plasmid, and the pFR-LUC reporter plasmid with (Control) or without the TATA element (dTATA). Promoter activity was assessed with the dual luciferase reporter assay. The normalized transcription activation activity is shown relative to the value of each control (arbitrarily set at 100).

Original western blot data for Fig. 1c

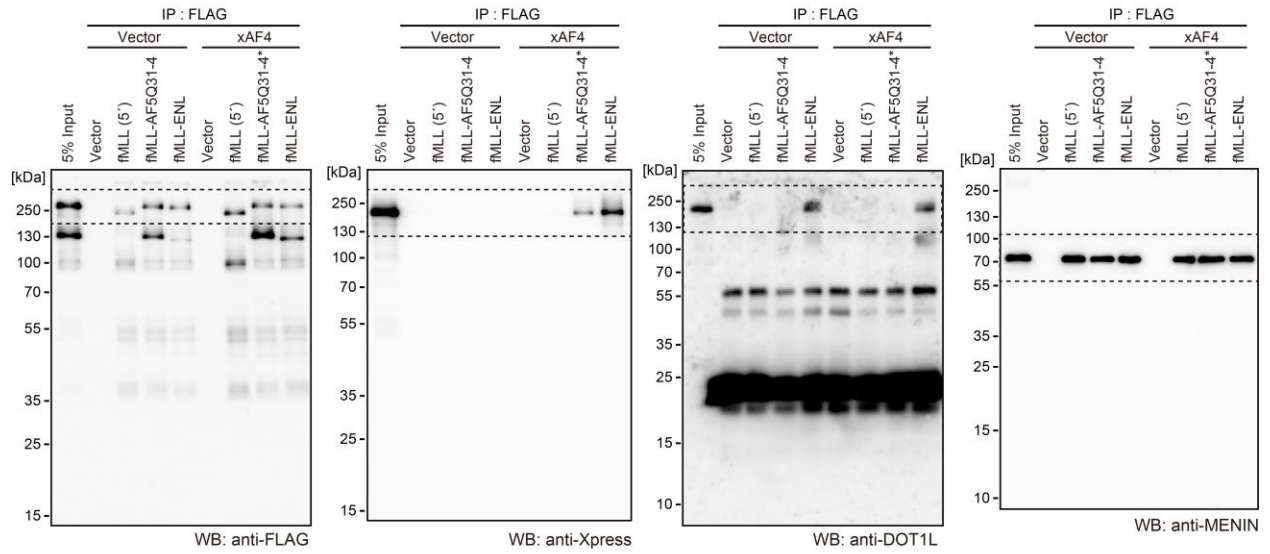

Original western blot data for Fig. 1d

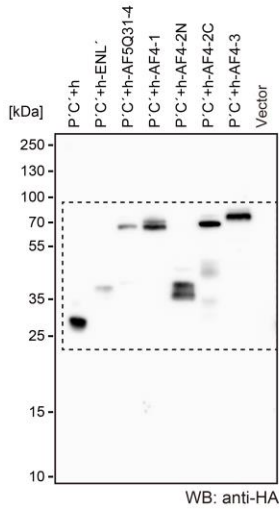

Supplementary Figure 6 Original western blot data for Figure 1c and 1d



Original western blot data for Fig. 2c

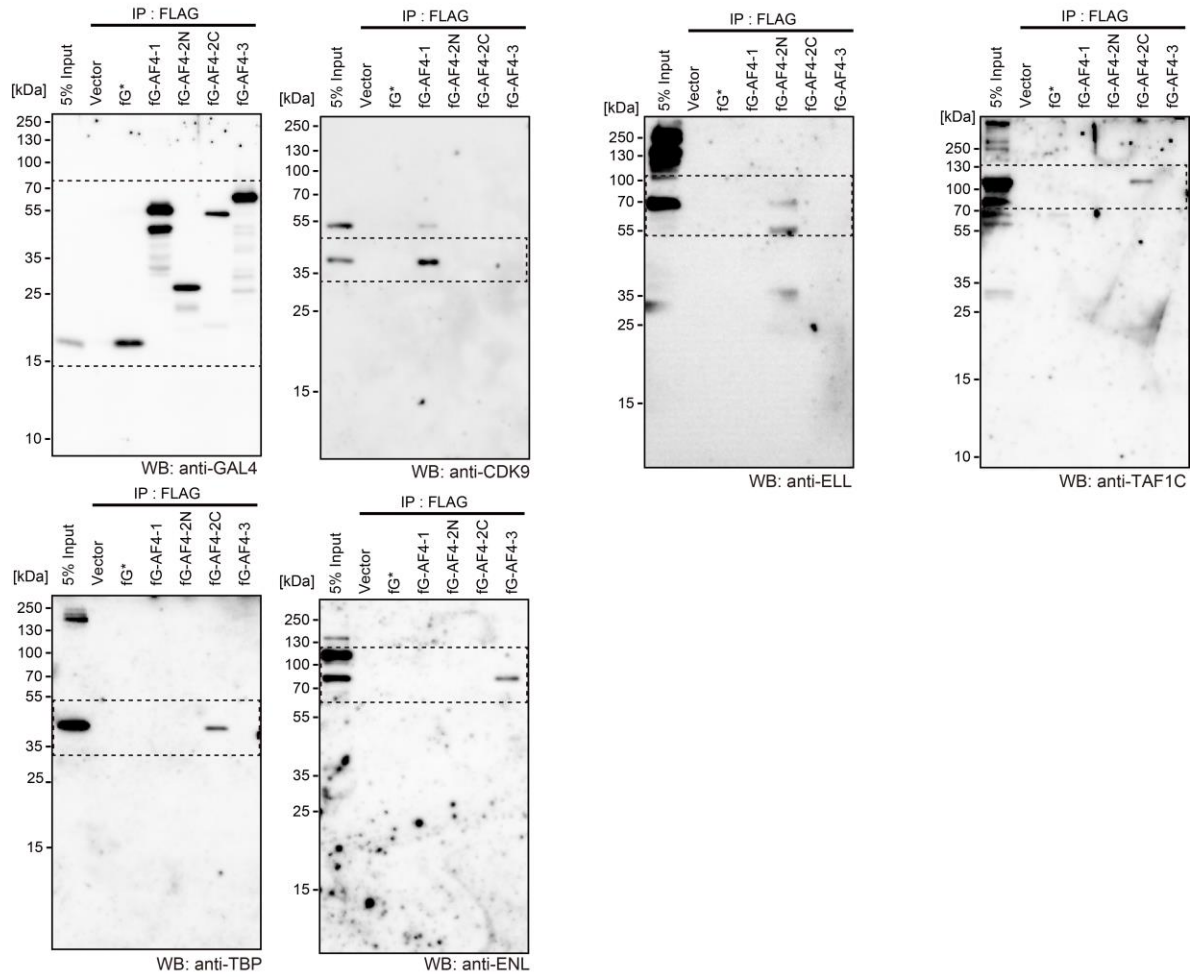

Original western blot data for Fig. 2d

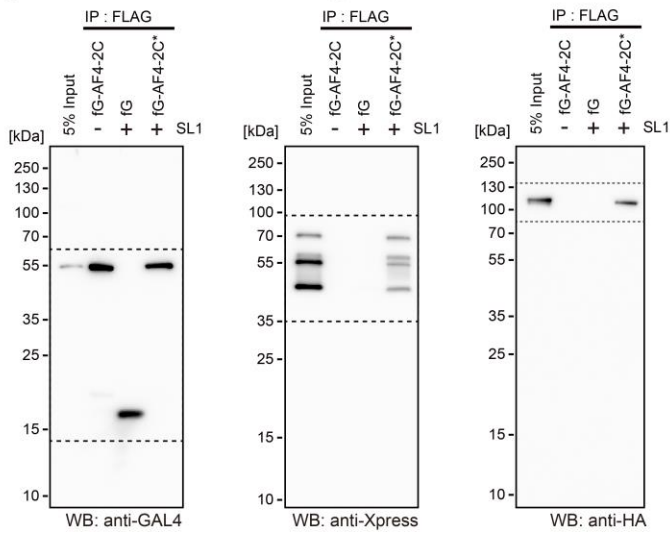

Supplementary Figure 7 Original western blot data for Figure 2c and 2d

Original western blot data for Fig. 2e

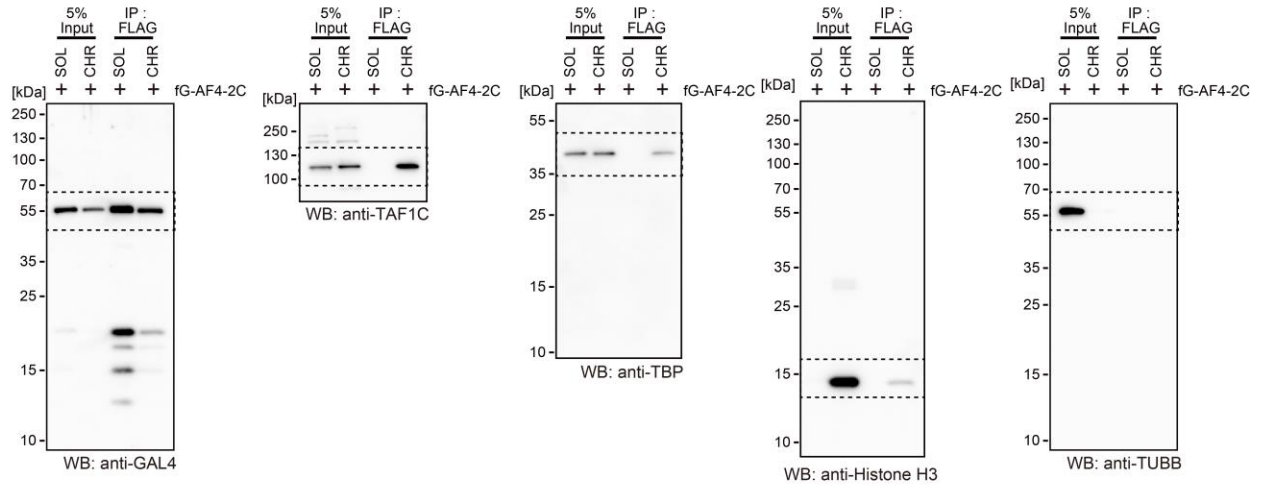

Original western blot and SYBR green stain data for Fig. 2f

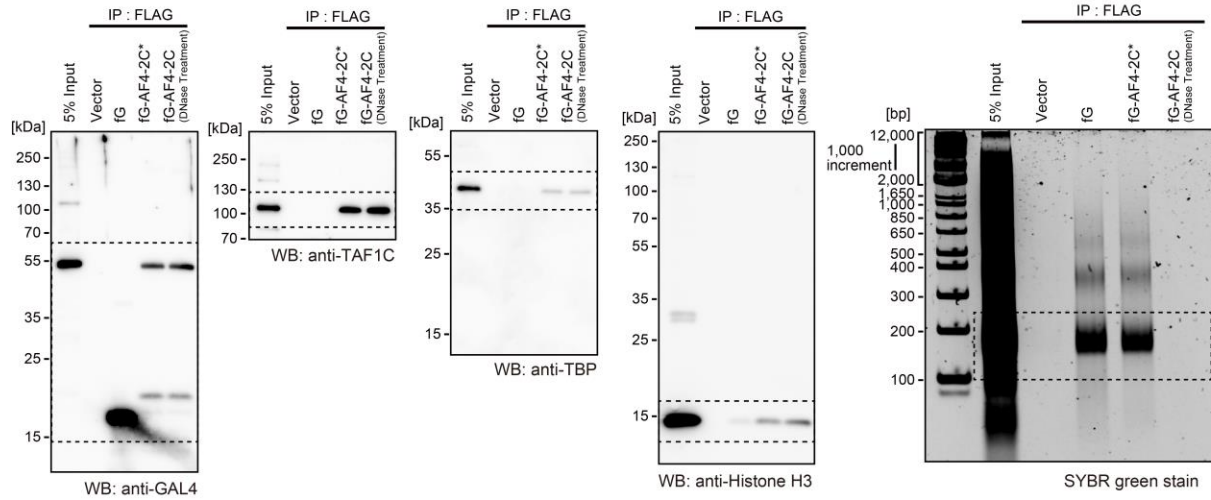

**Supplementary Figure 8** Original western blot data and gel image for Figure 2e and 2f

Original western blot data for Fig. 2g

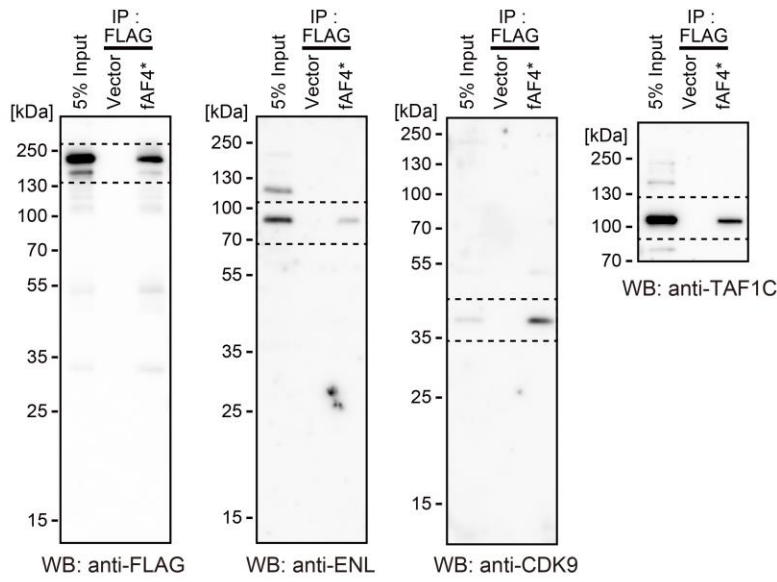

Original western blot data for Fig. 2h

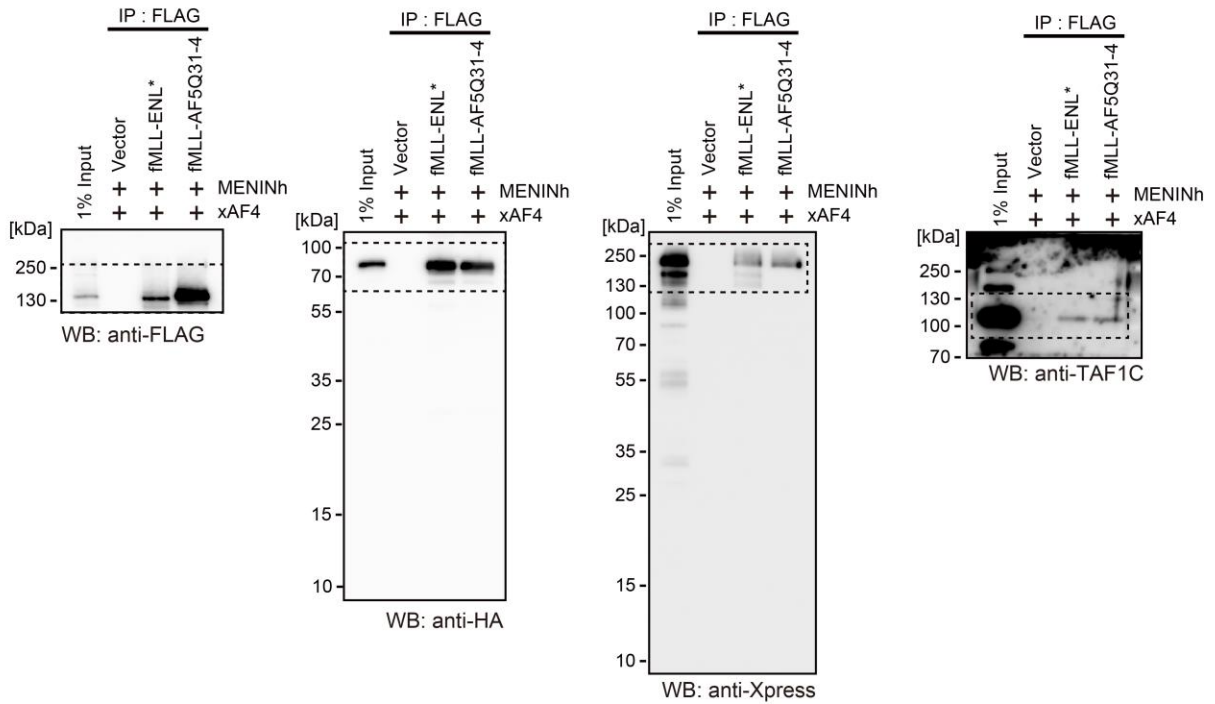

Supplementary Figure 9 Original western blot data and gel image for Figure 2g and 2h

Original western blot data for Fig. 5b

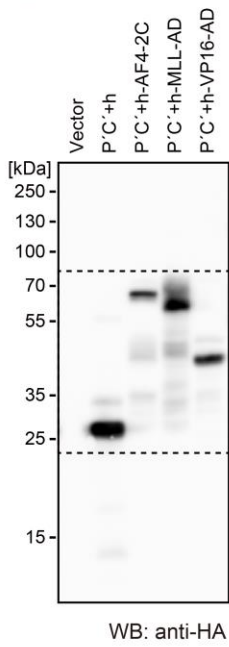

Original western blot data for Fig. 5d

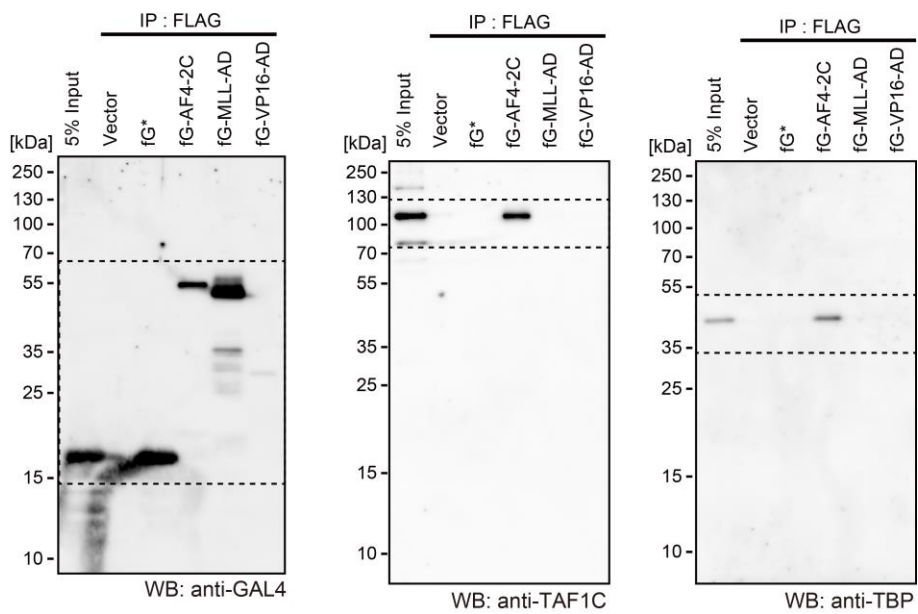

**Supplementary Figure 10** Original western blot data and gel image for Figure 5b and 5d

Original western blot data for Fig. 7c

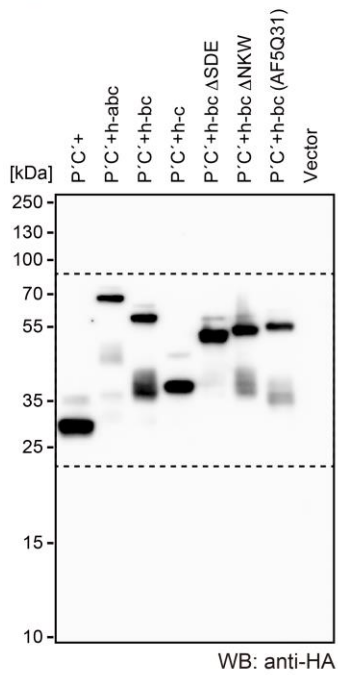

Original western blot data for Fig. 7e

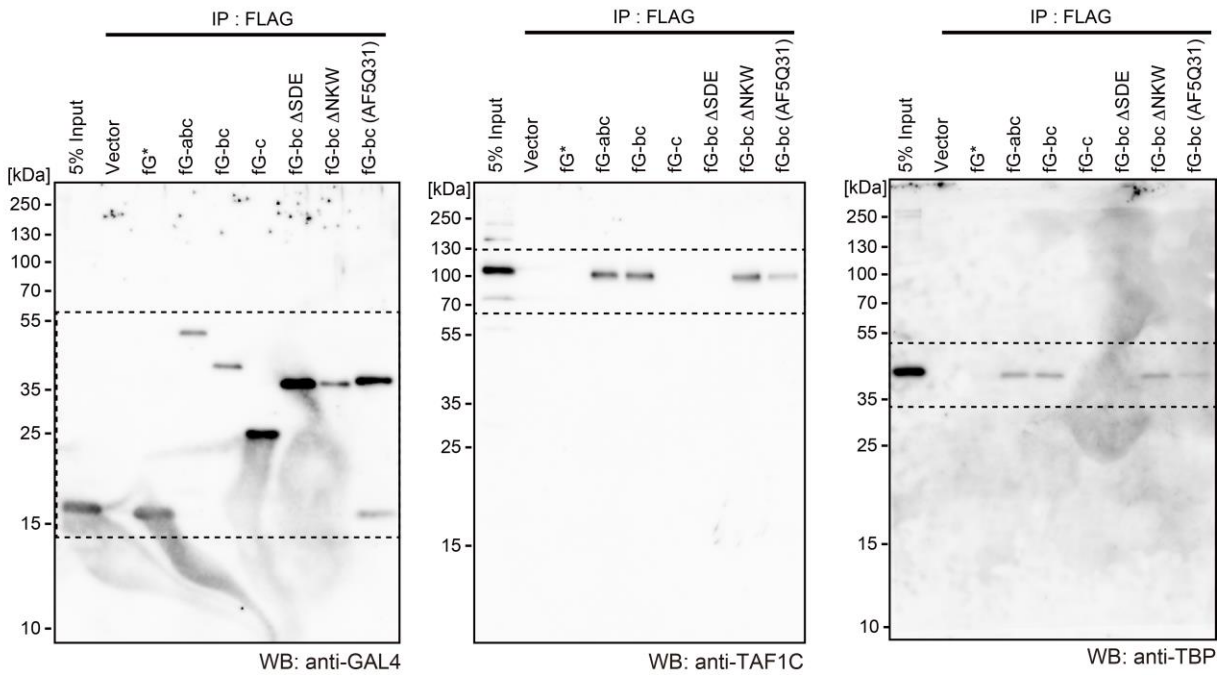

**Supplementary Figure 11** Original western blot data and gel image for Figure 7c and 7e

## Supplementary Tables

**Supplementary Table 1. List of MLL target genes in HB1119 cells**

|            |           |         |           |         |          |         |
|------------|-----------|---------|-----------|---------|----------|---------|
| ACTB       | C20orf103 | FAM36A  | LOC401093 | PAX5    | SMAD3    | ZEB2    |
| ACTG1      | CCND3     | FLT3    | LOC401097 | PBX3    | SMC4     | ZFHX3   |
| ADRBK1     | CD7       | GABPB1  | LRRK1     | PCBP1   | SNHG7    | ZFP36L2 |
| AKAP8      | CDCA7     | GPR150  | MACF1     | PIM3    | SOCS2    | ZMYND11 |
| ANKRD18B   | CDK6      | GTF2A1  | MAZ       | PLEKHO1 | SOX4     |         |
| ANP32A     | CDKN1B    | GUCY1A3 | MBNL1     | PROM1   | SRSF7    |         |
| ANP32B     | CDKN2C    | H2AFX   | MEF2A     | PTBP1   | SUPT3H   |         |
| APOLD1     | CHSY1     | H2AFY   | MEIS1     | PTMA    | SUV420H1 |         |
| ARID1A     | COMMD3    | H6PD    | MFSD11    | RASGRF1 | TAPT1    |         |
| ARID1B     | CPEB2     | HMGB1   | MID1IP1   | RCC1    | TBC1D14  |         |
| ASF1A      | CTBP1     | HNRNPAB | MIR17HG   | REEP3   | TCF12    |         |
| BAHCC1     | DLEU1     | HNRNPU  | MRPS34    | RHOBTB3 | TMSB4X   |         |
| BAZ1A      | DLEU2     | HOXA10  | MYB       | RNF220  | TNRC18   |         |
| BCL11A     | EEF1A1    | HOXA9   | MYC       | RPL10A  | TPM4     |         |
| BCL7A      | EIF4A1    | IRF2BP2 | NAT10     | RUNX2   | TRA2B    |         |
| BMI1       | EIF4A2    | IRX3    | NR3C1     | RXRA    | UBC      |         |
| BZRAP1-AS1 | EPHA8     | JMJD1C  | OAZ1      | SENP6   | UBE2QL1  |         |
| C18orf25   | FAM108C1  | LMNB1   | OTUD1     | SFPQ    | ZC3H12C  |         |

**Supplementary Table 2. Antibodies used in this study**

| Antigen       | Antibody type     | ID/product no. | Source/reference                         | Application (Dilution) |
|---------------|-------------------|----------------|------------------------------------------|------------------------|
| FLAG tag      | Rabbit polyclonal | F-7425         | Sigma                                    | WB (1/1,000)           |
| FLAG tag      | Mouse monoclonal  | F-3165         | Sigma                                    | ChIP                   |
| HA tag        | Rat monoclonal    | 3F10           | Roche                                    | WB (1/1,000)           |
| Xpress        | Rabbit polyclonal | sc-499         | Santa Cruz Biotech.                      | WB (1/1,000)           |
| GAL4          | Rabbit polyclonal | sc-577         | Santa Cruz Biotech.                      | WB (1/1,000)           |
| TAF1C         | Rabbit polyclonal | A303-698A      | Bethyl Laboratories                      | WB (1/1,000)           |
| TAF1C         | Rabbit polyclonal | ab134394       | Abcam                                    | ChIP                   |
| TBP           | Rabbit polyclonal | sc-204         | Santa Cruz Biotech.                      | ChIP, WB (1/200)       |
| Histone H3    | Rabbit polyclonal | 39163          | Active Motif                             | WB (1/2,000)           |
| Tubulin, beta | Rabbit polyclonal | ab6046         | Abcam                                    | WB (1/1,000)           |
| CDK9          | Rabbit polyclonal | sc-8338        | Santa Cruz Biotech.                      | WB (1/200)             |
| ELL           | Rabbit polyclonal | A301-645A      | Bethyl Laboratories                      | WB (1/1,000)           |
| ENL           | Rabbit polyclonal | A302-267A      | Bethyl Laboratories                      | WB (1/1,000)           |
| MLL           | Rabbit polyclonal | rpN1           | Yokoyama et al. 2005<br>Cell 123, 207–18 | ChIP                   |
| MENIN         | Rabbit polyclonal | A300-105A      | Bethyl Laboratories                      | ChIP, WB (1/1,000)     |
| DOT1L         | Mouse monoclonal  | sc-390879      | Santa Cruz Biotech.                      | WB (1/200)             |
| AF4           | Goat polyclonal   | sc-49350       | Santa Cruz Biotech.                      | ChIP                   |
| NELF-A        | Rabbit polyclonal | A301-910A      | Bethyl Laboratories                      | ChIP                   |
| CDK9          | Rabbit monoclonal | ab76320        | Abcam                                    | ChIP                   |
| RNAP2         | Mouse monoclonal  | 05-263         | Millipore                                | ChIP                   |
| TAF1          | Mouse monoclonal  | sc-393981      | Santa Cruz Biotech.                      | ChIP                   |
| TAF1          | Rabbit polyclonal | A303-505A      | Bethyl Laboratories                      | WB (1/1,000)           |
| TFIIB         | Rabbit polyclonal | sc-225         | Santa Cruz Biotech.                      | WB (1/200)             |
| RNAP1(POLR1)  | Mouse monoclonal  | sc-48385       | Santa Cruz Biotech.                      | WB (1/200)             |
| RRN3          | Rabbit polyclonal | ab112052       | Abcam                                    | WB (1/1,000)           |
| p300          | Rabbit polyclonal | A300-358A      | Bethyl Laboratories                      | WB (1/1,000)           |

### Supplementary Table 3. Primers used for RT-qPCR

#### TaqMan Probes for mouse transcripts

| Gene               | Probe ID      |
|--------------------|---------------|
| <i>Gapdh</i>       | Mm99999915_g1 |
| <i>Actb</i>        | Mm00607939_s1 |
| <i>Tbp</i>         | Mm00446971_m1 |
| <i>Taf1c</i>       | Mm00498790_m1 |
| <i>Enl (Mllt1)</i> | Mm00452080_m1 |
| <i>Mll (Mll1)</i>  | Mm01179235_m1 |
| <i>Hoxa9</i>       | Mm00439364_m1 |
| <i>Hoxa10</i>      | Mm00433966_m1 |
| <i>Hoxc8</i>       | Mm00439369_m1 |
| <i>Hoxc9</i>       | Mm00433972_m1 |
| <i>Cdkn1b</i>      | Mm00438168_m1 |
| <i>Cdkn2c</i>      | Mm00483243_m1 |
| <i>Runx2</i>       | Mm00501580_m1 |
| <i>Af4 (Aff1)</i>  | Mm00547601_s1 |

#### TaqMan Probes for human transcripts

| Gene                 | Probe ID      |
|----------------------|---------------|
| <i>ACTB</i>          | Hs99999903_m1 |
| <i>GAPDH</i>         | Hs02758991_g1 |
| <i>HOXA9</i>         | Hs00365956_m1 |
| <i>CDKN1B</i>        | Hs01597588_m1 |
| <i>CDKN2C</i>        | Hs00176227_m1 |
| <i>LEDGF (PSIP1)</i> | Hs00253515_m1 |

#### Custom TaqMan Probes for human transcripts

| Probes   | Forward primer seq.        | Reverse primer seq.        | Reporter seq.       |
|----------|----------------------------|----------------------------|---------------------|
| 18S rRNA | GCAGGCGCGGGTAAC            | AAGCTTATGACCCGCACTTACTC    | CCGTTGAACCCCAITCGT  |
| 28S rRNA | AGTACGAATACAGACCGTGAAAGC   | TCTGACACCTCCTGCTTAAAACC    | ACGATCCTTCTGACCTTTT |
| FR LUC   | CATCCGGTTTTGGAATGTTTACTACA | GGGATCGTAAAAACAGCTCTTCTTCA | ACGACTCGAAATCCAC    |



**Supplementary Table 4. Primers used for ChIP-qPCR**

| Probes          | Forward primer seq.                    | Reverse primer seq.           | Reporter seq.         |
|-----------------|----------------------------------------|-------------------------------|-----------------------|
| ARP1 pre-TSS    | AGGGCAGTTGCTCTGAAGTC                   | CTGCAGAAGGAGCTCTTGA           | ACTGCCTGGCCACTCC      |
| ARP1 TSS        | AGAGAGAGTGCAGACCGA                     | GCCACTGGCAGTTTCTTTCTG         | CCTCTCCAGCTTTCTC      |
| ARP1 post-TSS   | CAGGCCAAGCGAATTACCT                    | AGTTGACTGGTGATCAATTTAAAGGAGTT | CTGGATGCCAAGCTCT      |
| HOXA7 pre-TSS   | GCCTTCCCCGTCTGGAT                      | ACTCTGCCAAGTCTTCTCTCA         | CAGGCCGGACTTAGAC      |
| HOXA7 TSS       | GACGCCTACGGCAACCT                      | GCCTTTGGCGAGGTCCT             | CCCTGCGCTCCTAC        |
| HOXA7 post-TSS  | TGCCAGGGTCCATTCAAGATG                  | CCCTCATCCCAGGACCTT            | CTCTGTCTCATTTCCC      |
| HOXA9 pre-TSS   | TGGTGCTTTTTTATGGCTTCAATT               | CCGCGTGGCAGTGC                | CCCCTCACATAAAATT      |
| HOXA9 TSS       | TCACCACCACCCTACGT                      | GCAAGCCCGGAAGGA               | CAGGAGCGCATGTACC      |
| HOXA9 post-TSS  | AGTGGCGGCTAAATCCT                      | TGATCACGCTGTGGCTTATTGAA       | CCCGCAGCCTCATC        |
| CDKN1B pre-TSS  | GTCCCGAGGGTCCCTTC                      | GTGTGCCTACCTCATCTCATACG       | CAGCTGTCACATTCTG      |
| CDKN1B TSS      | GGGTCTGTGTCTTTGGCT                     | GCCCGAACCCTCTCG               | CCAGCGACTGCCCTC       |
| CDKN1B post-TSS | GCTTTGGGAGAGCTAACTTTATTGGT             | CGGATCTTACCATCTCCAGTTTCTG     | ACCTGGCCCACTGCTT      |
| CDKN2C pre-TSS  | CTCCACAACCGTCTTAAATAACAAACC            | GCGGGCTTGAGTCTGTGA            | CAGCTGCCCAATTC        |
| CDKN2C TSS      | GGCGGCTGCCCTGT                         | CCCGGTGCCACTTTGC              | CTGTGCCCTTTGCTG       |
| CDKN2C post-TSS | CTGTGGAGTCGTCAGAATCTTCAT               | CGATTCACACGTGATTATCAGCAAA     | CCTCGCTCGCTTTT        |
| LEDGF pre-TSS   | CCACCTACCAGCTCCTATCTACTA               | GGATGTGAGTTTGGGCCCTAA         | TAGCTGCATCTAAATTTT    |
| LEDGF TSS       | CCCCGGCAGGTGAGC                        | GCCCAGCGGCTGCA                | TTCCCCGCTACAGCCAG     |
| LEDGF post-TSS  | TGTTTAAAAATTAGTGAAACATTGACATTTCCATAGTT | TTCTCTGACATCCAAGTGTGTTGT      | TTGGATCAAGTACAAAATATC |
| LUC pre-TSS     | CGGCATTCTATCTCTAG                      | AGGGCGTATCTTTCATAGCCTTAT      | CTCCAGCGGTTCCATC      |
| LUC TSS         | GGGCTGAATACAAATCACAGAATCG              | CCAACACCGGCATAAAGAATTGAAG     | ATGCAGTGAAGTCTCT      |
| LUC post-TSS    | CATCACGGTTTTGGAATGTTACTACA             | GGGATCGTAAAAACAGCTCTTCTCA     | ACGACTCGAAATCCAC      |
